# Supplementary material for: Titanium–salen complexes as initiators for the ring opening polymerisation of rac-lactide
Source: Royal Society of Chemistry journal article supplement (doi:10.1039/b518266b), 2006-01-01
Supplement: b518266b.pdf [file b518266b.pdf]

## Supplementary Data — X-Ray Crystallography

**Manuscript:** Titanium-Salen Complexes as Initiators for the Ring Opening Polymerisation of *rac*-Lactide

**Authors:** Charlotte K. A. Gregson, Ian J. Blackmore, Vernon C. Gibson, Nicholas J. Long, Edward L. Marshall, Andrew J.P. White

Both of the isopropoxide groups in the structure of **6** are disordered, two orientations having been identified for the C<sub>3</sub> units in each case with occupancies of 60:40 and 75:25 for the O(37) and O(41) groups respectively.

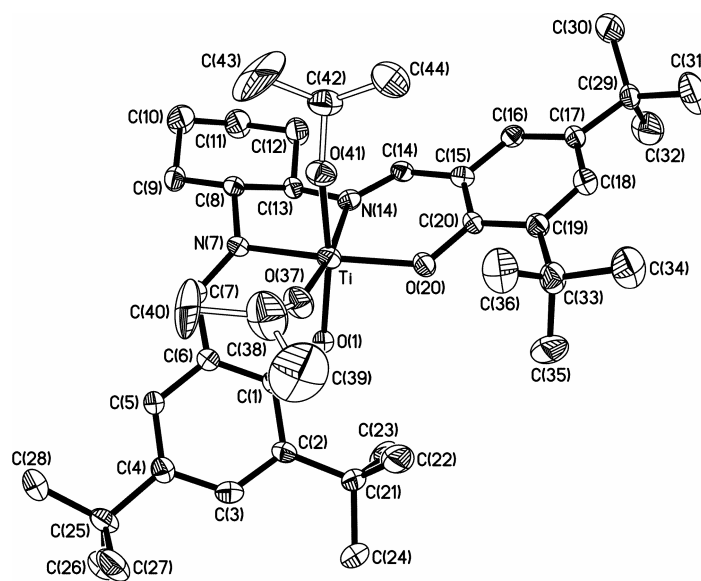

**Fig. S1** The molecular structure of **6** (40% probability ellipsoids).
